# Supplementary material for: Morphologic, Phylogenetic and Chemical Characterization of a Brackish Colonial Picocyanobacterium (Coelosphaeriaceae) with Bioactive Properties
Source: PubMed Central journal article supplement (PMC4848634; doi:10.3390/toxins8040108), 2016-04-12
Supplement: toxins-08-00108-s001.pdf [file toxins-08-00108-s001.pdf]

# Supplementary Materials: Morphologic, Phylogenetic and Chemical Characterization of a Brackish Colonial Picocyanobacterium (Coelosphaeriaceae) with Bioactive Properties

Kerstin Häggqvist <sup>1,\*</sup>, Anna Toruńska-Sitarz <sup>2</sup>, Agata Błaszczyk <sup>2</sup>, Hanna Mazur-Marzec <sup>2</sup> and Jussi Meriluoto <sup>1</sup>

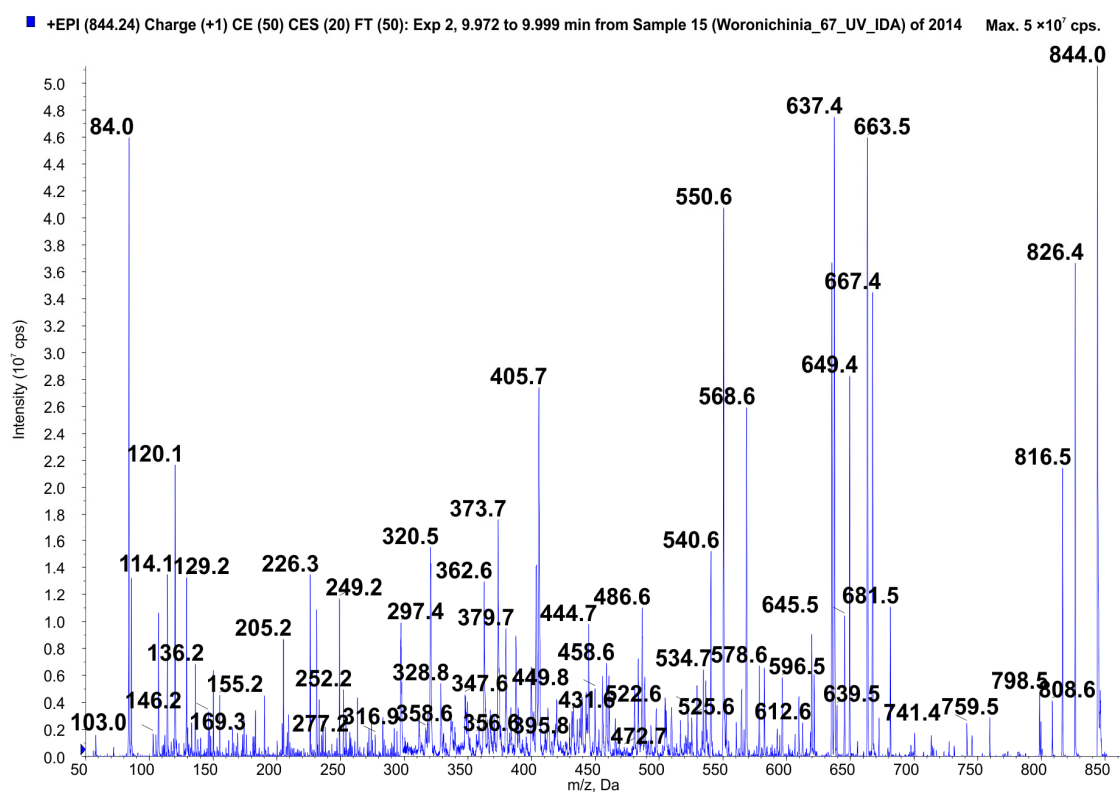

**Figure S1.** LC-MS/MS ion fragmentation spectrum of suggested anabaenopeptin A. The intensity of the ion on the  $y$ -axis is given as counted ions per second (cps) and the mass-to-charge ratio ( $m/z$ ) on the  $x$ -axis. The suggested fragmented ions are at the  $m/z$  values: 844 [M + H]; 826 [M + H - H<sub>2</sub>O]; 816 [M + H - CO]; 798 [M + H - H<sub>2</sub>O - CO]; 759 [M + H - N-MeAla]; 741 [M + H - N-MeAla - H<sub>2</sub>O]; 681 [M + H - Tyr]; 667 [M + H - Htyr]; 663 [M + H - Tyr - H<sub>2</sub>O]; 649 [M + H - Htyr - H<sub>2</sub>O]; 637 [M + H - (CO + Tyr)]; 568 [M + H - (Htyr + Val)]; 534 [M + H - (CO + Tyr) - N-MeAla - H<sub>2</sub>O]; 405 [Lys + Val + Htyr + H]; 373 [Phe + Lys + Val - H]; 362 [N-MeAla + Htyr + Val + H]; 249 [Htyr + Val + H - CO]; 136 Tyr immonium ion; 120 Phe immonium ion; 114 [N-MeAla + CO + H]; 84 Lys immonium ion.

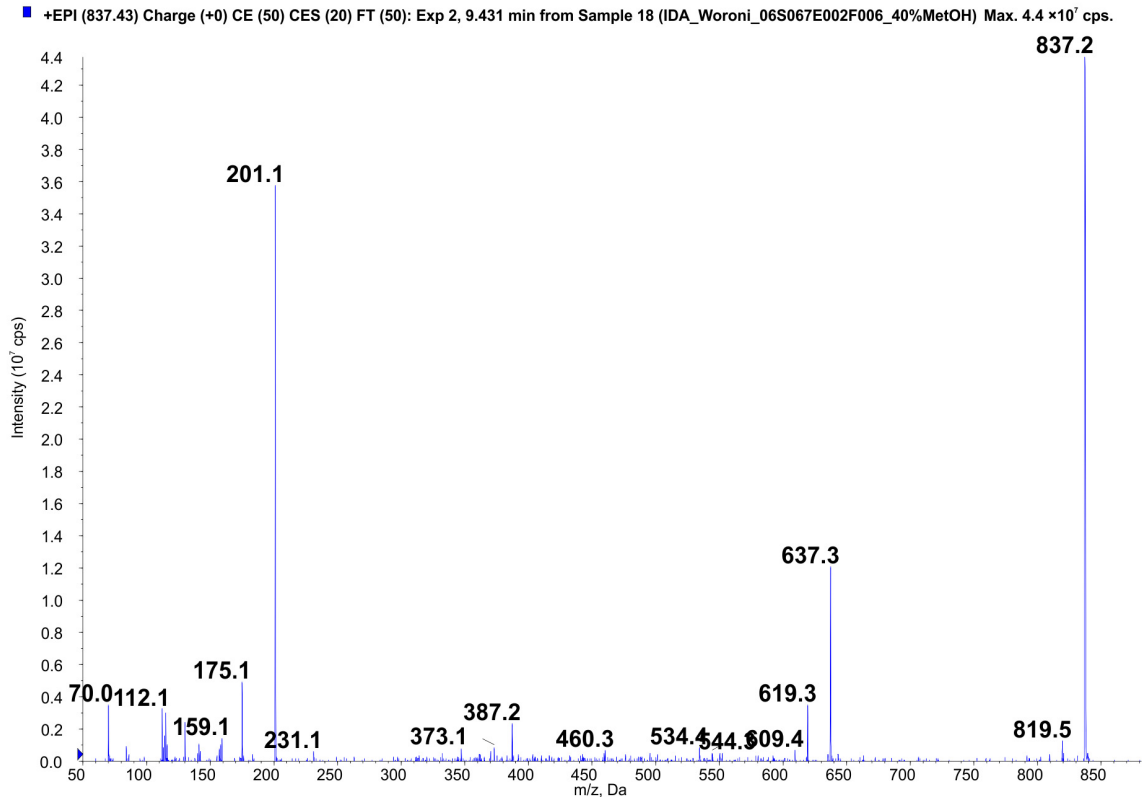

**Figure S2.** LC-MS/MS ion fragmentation spectrum of suggested anabaenopeptin B. The intensity of the ion on the  $y$ -axis is given as counted ions per second (cps) and the mass-to-charge ratio ( $m/z$ ) on the  $x$ -axis. The suggested fragmented ions are at the  $m/z$  values: 837 [M + H]; 819 [M + H - H<sub>2</sub>O]; 637 [M + H - (CO + Arg)]; 619 [M + H - (CO + Arg) - H<sub>2</sub>O]; 609 [M + H - (CO + Arg) - CO]; 460 [M + H - (CO + Arg) - Htyr]; 387 [Lys + Val + Htyr + H - H<sub>2</sub>O]; 373 [Phe + Lys + Val - H]; 231 [N-MeAla + Phe - H]; 201 [CO + Arg + H]; 175 [Arg + 2H]; 112 Arg ion; 84 Lys immonium ion.

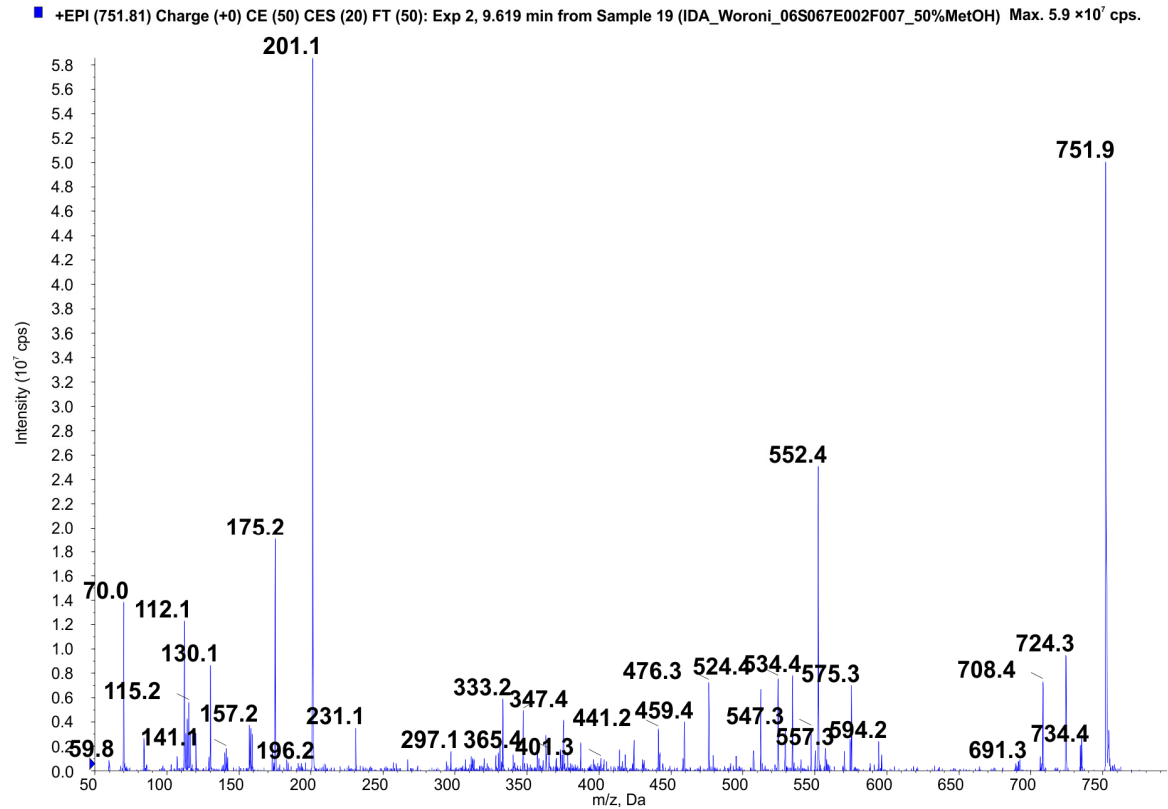

**Figure S3.** LC-MS/MS ion fragmentation spectrum of anabaenopeptin 752, a molecule tentatively related to anabaenopeptin B and fragmented ions identified by their mass-to-charge ratios ( $m/z$ ). The intensity of the ion on the  $y$ -axis is given as counted ions per second (cps) and the mass-to-charge ratio ( $m/z$ ) on the  $x$ -axis. The suggested fragmented ions are at the  $m/z$  values: 752 [M + H]; 734 [M + H - H<sub>2</sub>O]; 724 [M + H - CO]; 575 [M + H - Htyr]; 557 [M + H - Htyr - H<sub>2</sub>O]; 552 [M + H - (CO + Arg)]; 534 [M + H - (CO + Arg) - H<sub>2</sub>O]; 547 [M + H - Htyr - CO]; 524 [M + H - (CO + Arg) - CO]; 476 [Phe + Lys + (CO + Arg) + H]; 347 [Phe + Lys + Val + H - CO]; 231 [Val + Htyr + H - CO - H<sub>2</sub>O]; 201 [CO + Arg + H]; 175 [Arg + 2H]; 112 Arg ion; 84 Lys immonium ion.

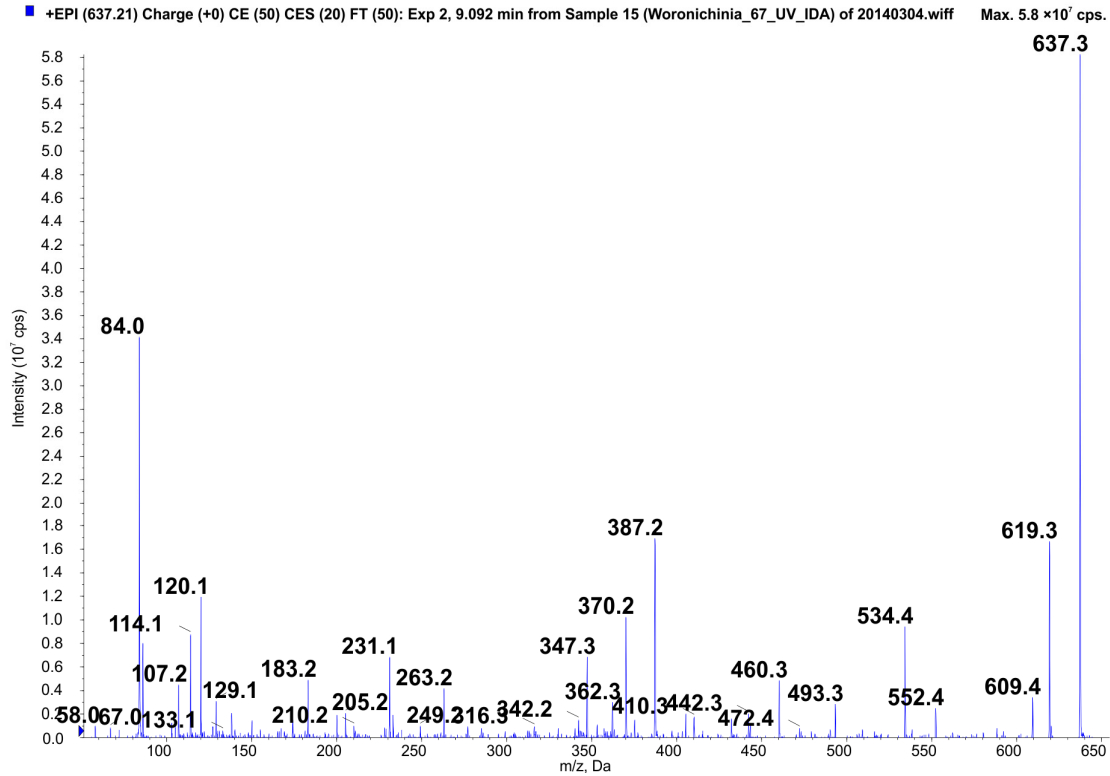

**Figure S4.** LC-MS/MS ion fragmentation spectrum of anabaenopeptin 637, the suggested ring part of anabaenopeptin B and fragmented ions identified by their mass-to-charge ratios ( $m/z$ ). The intensity of the ion on the  $y$ -axis is given as counted ions per second (cps) and the mass-to-charge ratio ( $m/z$ ) on the  $x$ -axis. The suggested fragmented ions are at the  $m/z$  values: 637 [M + H]; 619 [M + H – H<sub>2</sub>O]; 609 [M + H – CO]; 552 [M + H – N-MeAla]; 534 [M + H – N-MeAla – H<sub>2</sub>O]; 460 [N-MeAla + Phe + Lys + Val + H]; 442 [N-MeAla + Phe + Lys + Val + H – H<sub>2</sub>O]; 387 [Lys + Val + Htyr + H – H<sub>2</sub>O]; 362 [N-MeAla + Htyr + Val + H]; 316 [N-MeAla + Htyr + Val + H – CO – H<sub>2</sub>O]; 263 [N-MeAla + Htyr + H]; 231 [N-MeAla + Phe – H]; 120 Phe immonium ion; 114 [N-MeAla + CO + H]; 84 Lys immonium ion; 58 MeAla immonium ion.

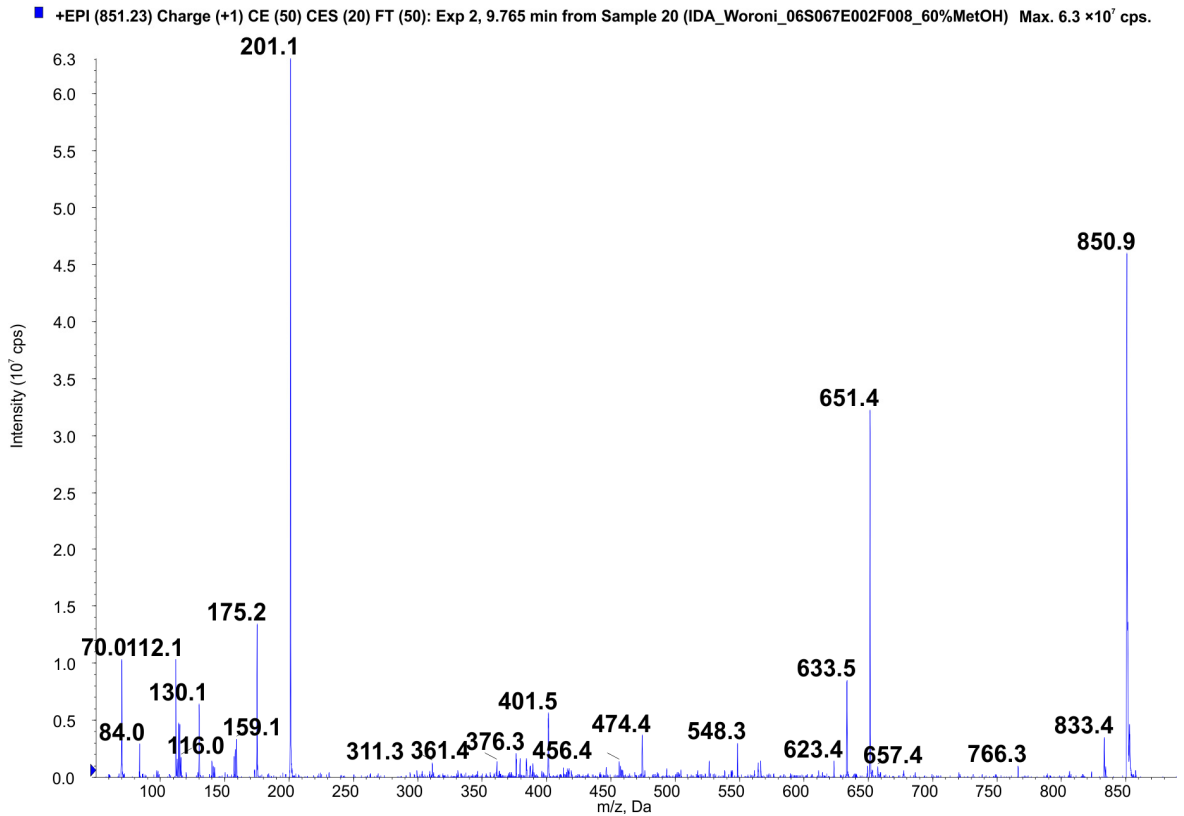

**Figure S5.** LC-MS/MS ion fragmentation spectrum of suggested anabaenopeptin F and fragmented ions identified by their mass-to-charge ratios ( $m/z$ ). The intensity of the ion on the  $y$ -axis is given as counted ions per second (cps) and the mass-to-charge ratio ( $m/z$ ) on the  $x$ -axis. The suggested fragmented ions are at the  $m/z$  values: 851 [M + H]; 833 [M + H - H<sub>2</sub>O]; 766 [M + H - N-MeAla]; 651 [M + H - (CO + Arg)]; 633 [M + H - (CO + Arg) - H<sub>2</sub>O]; 623 [M + H - (CO + Arg) - CO]; 474 [M + H - (CO + Arg) - Htyr]; 401 [Lys + Ile + Htyr + H - H<sub>2</sub>O]; 376 [N-MeAla + Htyr + Ile + H]; 361 [N-MeAla + Phe + Lys + H]; 201 [CO + Arg + H]; 175 [Arg + 2H]; 112 Arg ion; 84 Lys immonium ion.

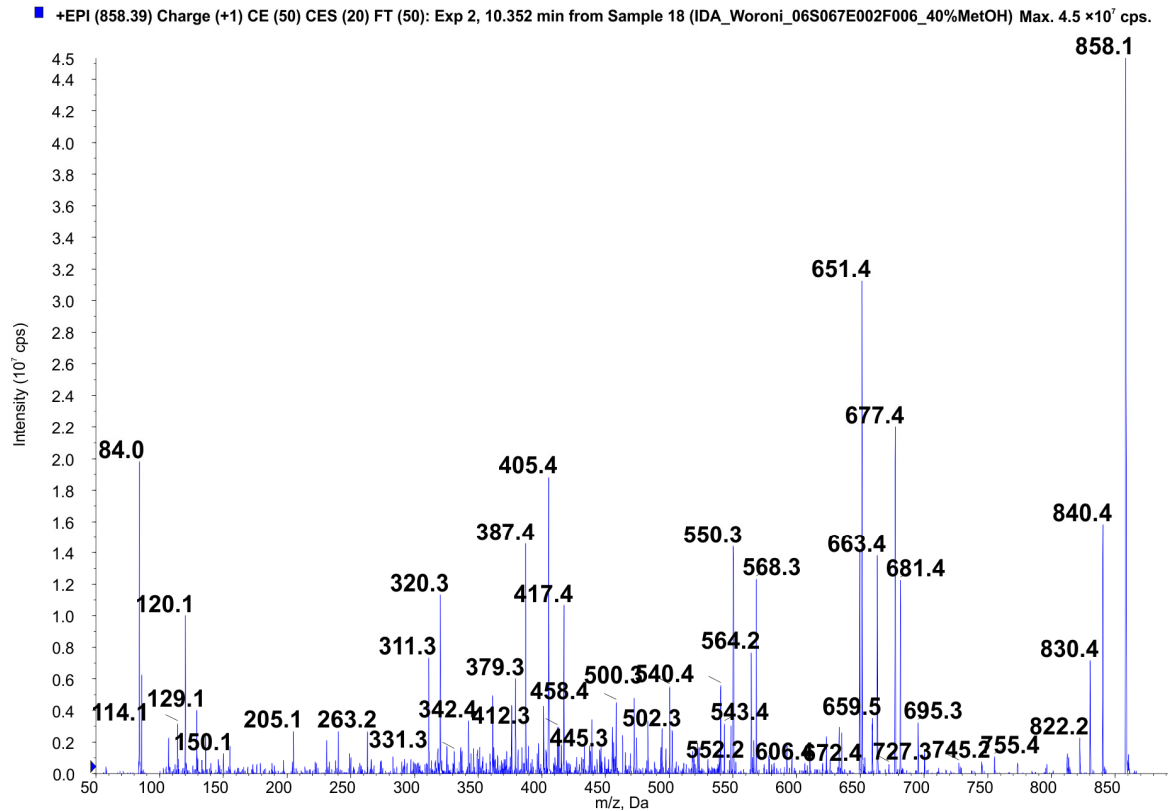

**Figure S6.** LC-MS/MS ion fragmentation spectrum of suggested oscillamide Y, and fragmented ions identified by their mass-to-charge ratios ( $m/z$ ). The intensity of the ion on the  $y$ -axis is given as counted ions per second (cps) and the mass-to-charge ratio ( $m/z$ ) on the  $x$ -axis. The suggested fragmented ions are at the  $m/z$  values: 858 [M + H]; 840 [M + H - H<sub>2</sub>O]; 830 [M + H - CO]; 755 [M + H - N-MeAla - H<sub>2</sub>O]; 695 [M + H - Tyr]; 681 [M + H - Htyr]; 677 [M + H - Tyr - H<sub>2</sub>O]; 651 [M + H - (CO + Tyr)]; 568 [M + H - (Htyr + Ile)]; 550 [M + H - (Htyr + Ile) - H<sub>2</sub>O]; 405 [M + H - Tyr - (Htyr + Ile)]; 263 [N-MeAla + Htyr + H]; 150 Htyr immonium ion; 120 Phe immonium ion; 114 [N-MeAla + CO + H]; 84 Lys immonium ion.

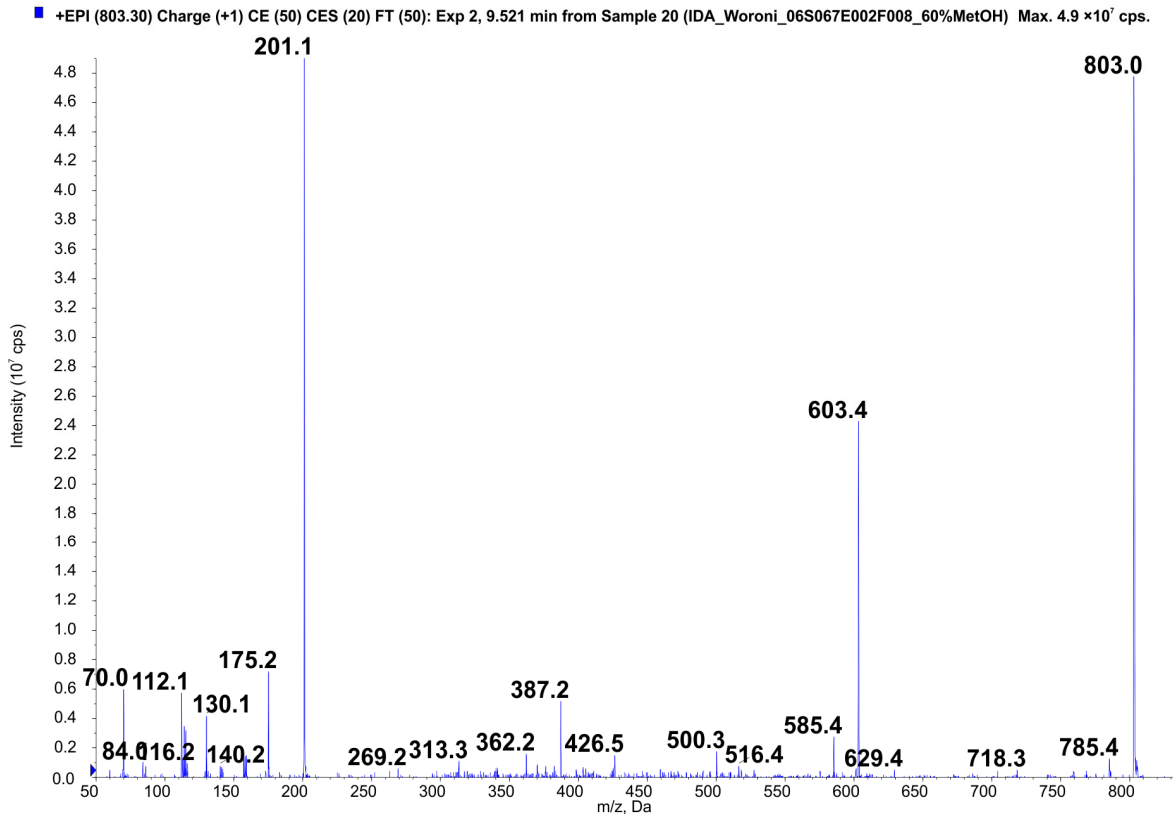

**Figure S7.** LC-MS/MS ion fragmentation spectrum of the suggested anabaenopeptin 802 and fragmented ions identified by their mass-to-charge ratios ( $m/z$ ). The intensity of the ion on the  $y$ -axis is given as counted ions per second (cps) and the mass-to-charge ratio ( $m/z$ ) on the  $x$ -axis. The suggested fragmented ions are at the  $m/z$  values: 803 [M + H]; 785 [M + H – H<sub>2</sub>O]; 603 [M + H – (CO + Arg)]; 585 [M + H – (CO + Arg) – H<sub>2</sub>O]; 500 [M + H – (CO + Arg) – *N*-MeAla – H<sub>2</sub>O]; 426 [M + H – (CO + Arg) – Htyr]; 387 [Lys + Val + Htyr + H – H<sub>2</sub>O]; 362 [*N*-MeAla + Htyr + Val + H]; 313 [Ile/Leu + Lys + Val + H – CO]; 201 [CO + Arg + H]; 175 [Arg + 2H]; 112 Arg ion; 84 Lys immonium ion.

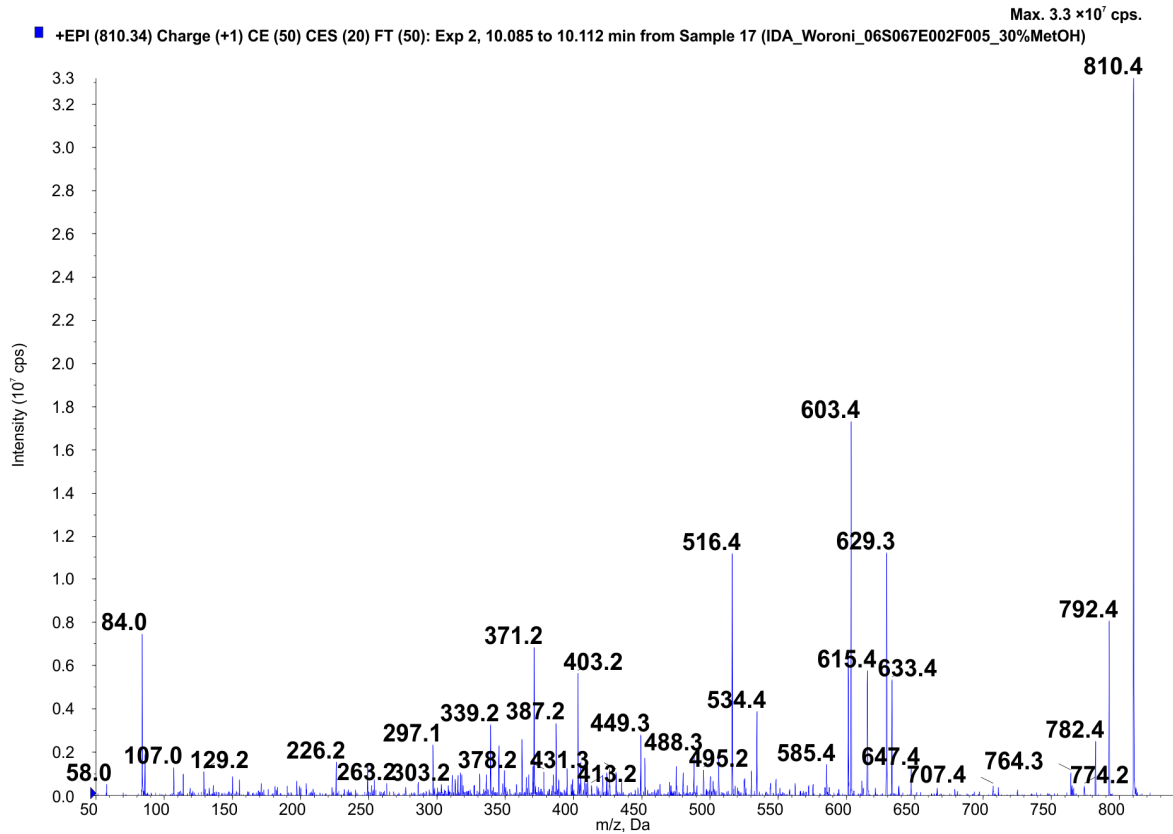

**Figure S8.** LC-MS/MS ion fragmentation spectrum of the suggested anabaenopeptin 809 and fragmented ions identified by their mass-to-charge ratios ( $m/z$ ). The intensity of the ion on the  $y$ -axis is given as counted ions per second (cps) and the mass-to-charge ratio ( $m/z$ ) on the  $x$ -axis. The suggested fragmented ions are at the  $m/z$  values: 810 [M + H]; 792 [M + H - H<sub>2</sub>O]; 782 [M + H - CO]; 764 [M + H - H<sub>2</sub>O - CO]; 647 [M + H - Tyr]; 633 [M + H - Htyr]; 629 [M + H - Tyr - H<sub>2</sub>O]; 603 [M + H - (CO + Tyr)]; 585 [M + H - (CO + Tyr) - H<sub>2</sub>O]; 534 [M + H - Ile/Leu-Tyr]; 516 [M + H - Ile/Leu - Tyr - H<sub>2</sub>O]; 488 [M + H - Ile/Leu - Tyr - H<sub>2</sub>O - CO]; 449 [M + H - Tyr - (N-MeAla + Ile/Leu)]; 431 [M + H - Tyr - (N-MeAla + Ile/Leu) - H<sub>2</sub>O]; 403 [Lys + Val + Htyr - H]; 387 [Lys + Val + Htyr + H - H<sub>2</sub>O]; 339 [Val + Lys + Ile/Leu - H]; 263 [N-MeAla + Htyr + H]; 84 Lys immonium ion; 58 MeAla immonium ion.



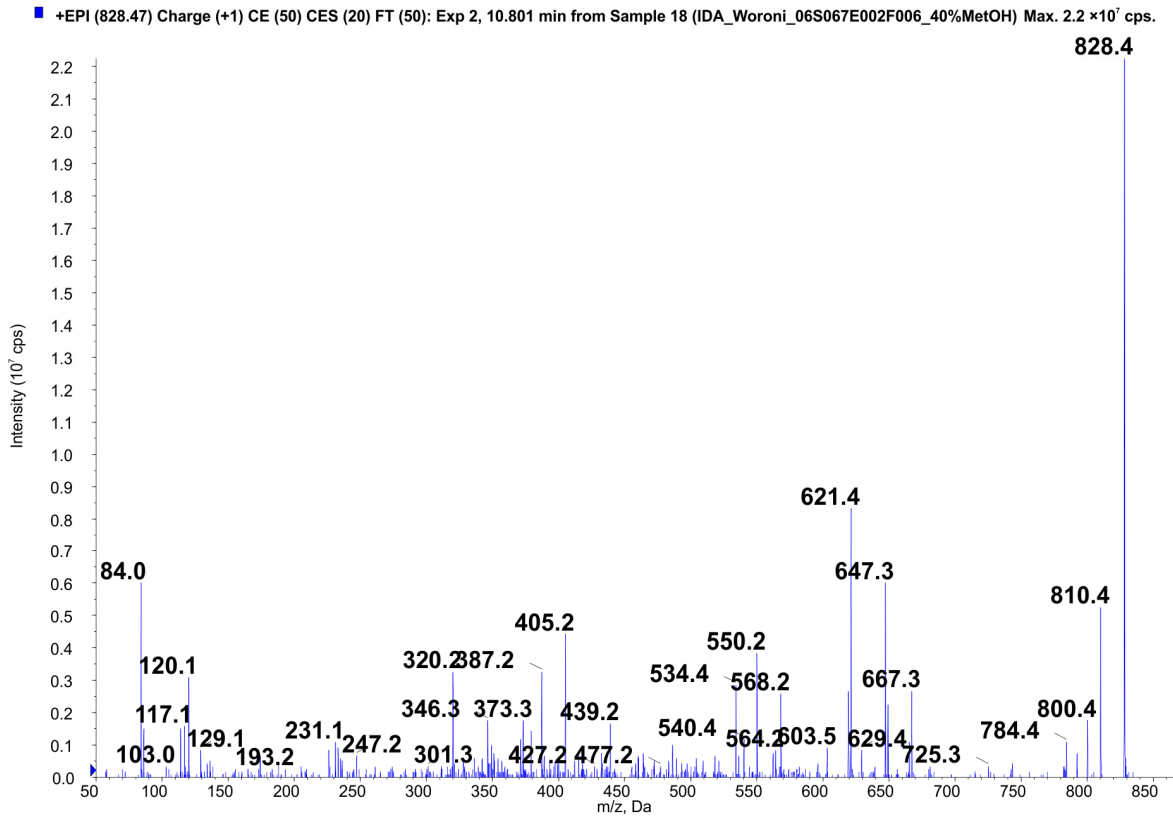

**Figure S9.** LC-MS/MS ion fragmentation spectrum of the suggested anabaenopeptin 827 and fragmented ions identified by their mass-to-charge ratios ( $m/z$ ). The intensity of the ion on the  $y$ -axis is given as counted ions per second (cps) and the mass-to-charge ratio ( $m/z$ ) on the  $x$ -axis. The suggested fragmented ions are at the  $m/z$  values: 828 [M + H]; 810 [M + H - H<sub>2</sub>O]; 800 [M + H - CO]; 725 [M + H - N-MeAla - H<sub>2</sub>O]; 647 [M + H - Tyr - H<sub>2</sub>O]; 621 [M + H - (CO + Tyr)]; 603 [M + H - (CO + Tyr) - H<sub>2</sub>O]; 534 [M + H - Tyr - N-MeAla - CO - H<sub>2</sub>O]; 405 [M + H - Tyr - (Hph + Val)]; 387 [Lys + Val + Hph - H]; 373 [Phe + Lys + Val - H]; 320 [M + H - Tyr - (Val + Hph + N-MeAla)]; 247 [N-MeAla + Hph + H]; 231 [N-MeAla + Phe - H]; 120 Phe immonium ion; 84 Lys immonium ion.

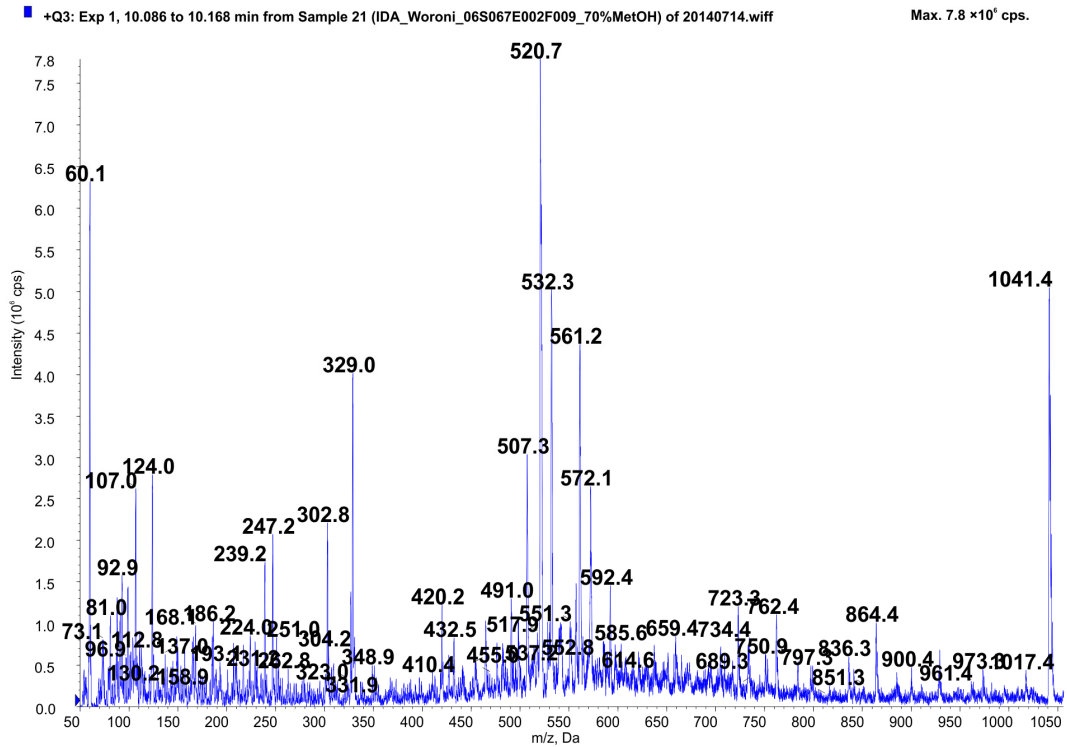

**Figure S10.** LC-MS/MS ion fragmentation spectrum of a suggested cyanopeptolin-like compound and fragmented ions identified by their mass-to-charge ratios ( $m/z$ ). The intensity of the ion on the  $y$ -axis is given as counted ions per second (cps) and the mass-to-charge ratio ( $m/z$ ) on the  $x$ -axis. The suggested fragmented ions are at the  $m/z$  values: 800 [the ring structure]; 521 [Lys + Ahp + Phe + MeTyr – H<sub>2</sub>O – CO + H]; 420 [Ahp + Phe + MeTyr – H<sub>2</sub>O + H].

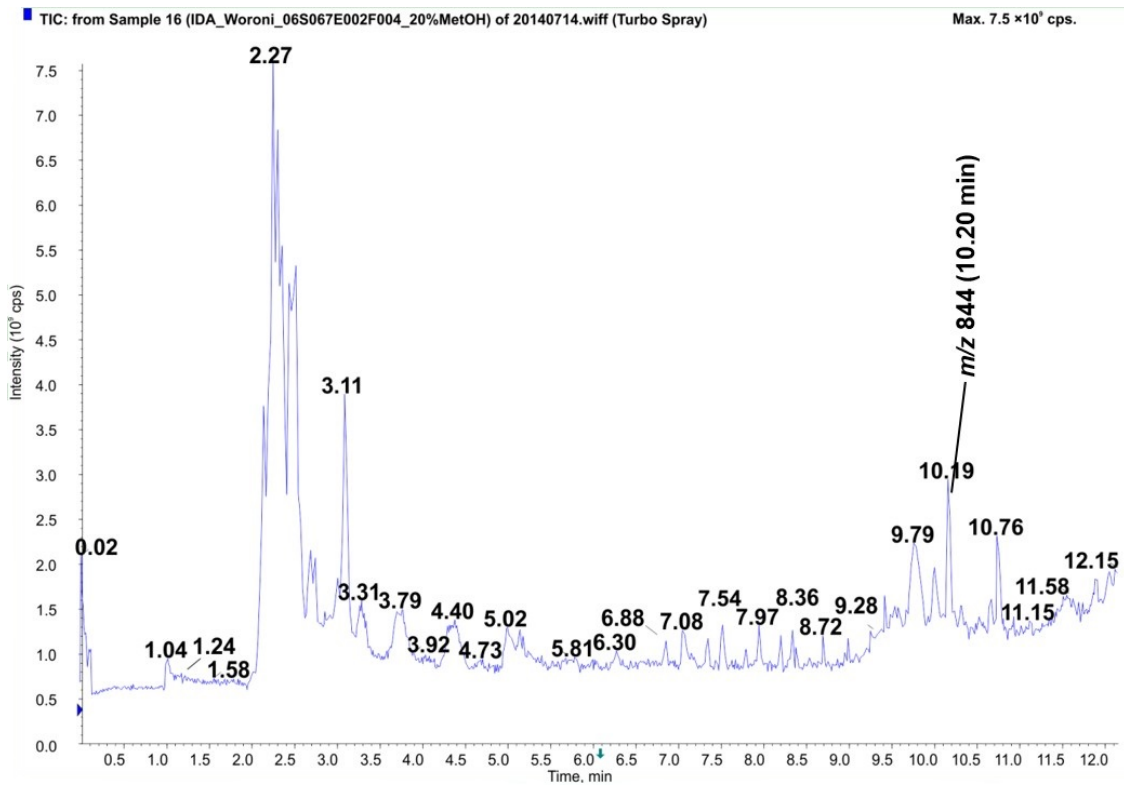

**Figure S11.** LC-MS/MS chromatogram of the 20% methanol fraction indicating the compound at  $m/z$  844. The intensity of the ion on the  $y$ -axis is given as counted ions per second (cps) and the time (minutes) on the  $x$ -axis.

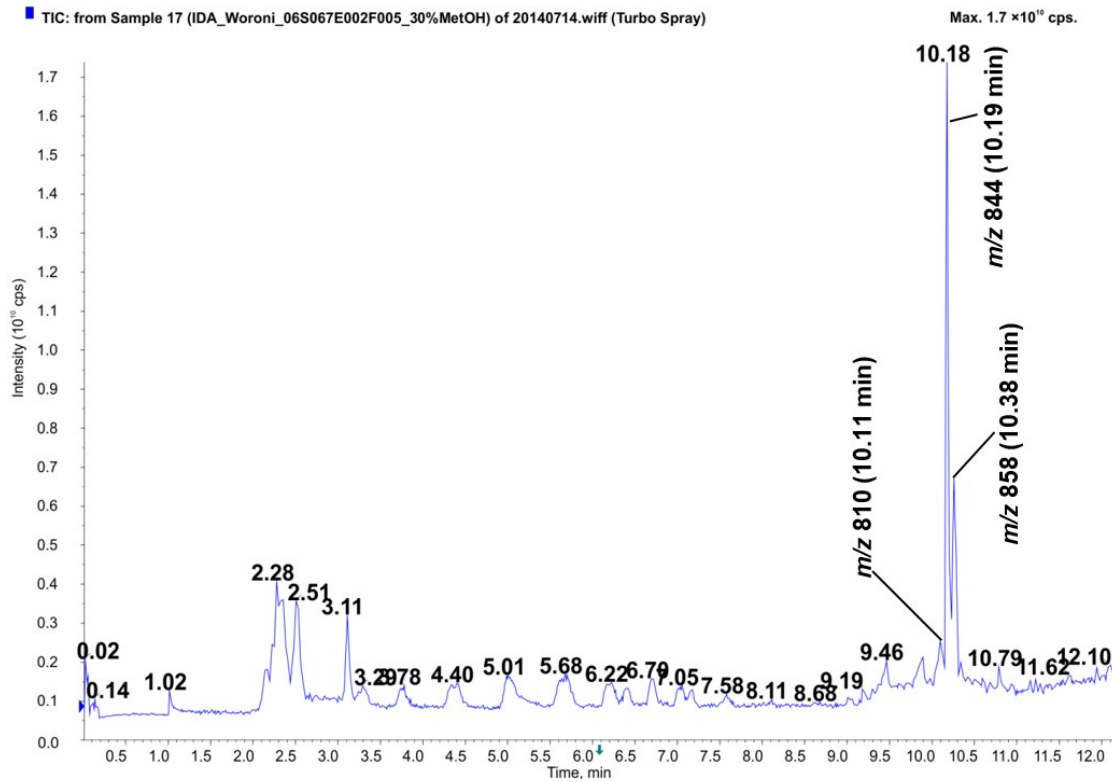

**Figure S12.** LC-MS/MS chromatogram of the 30% methanol fraction indicating the compounds at  $m/z$  810, 844 and 858. The intensity of the ion on the  $y$ -axis is given as counted ions per second (cps) and the time (minutes) on the  $x$ -axis.

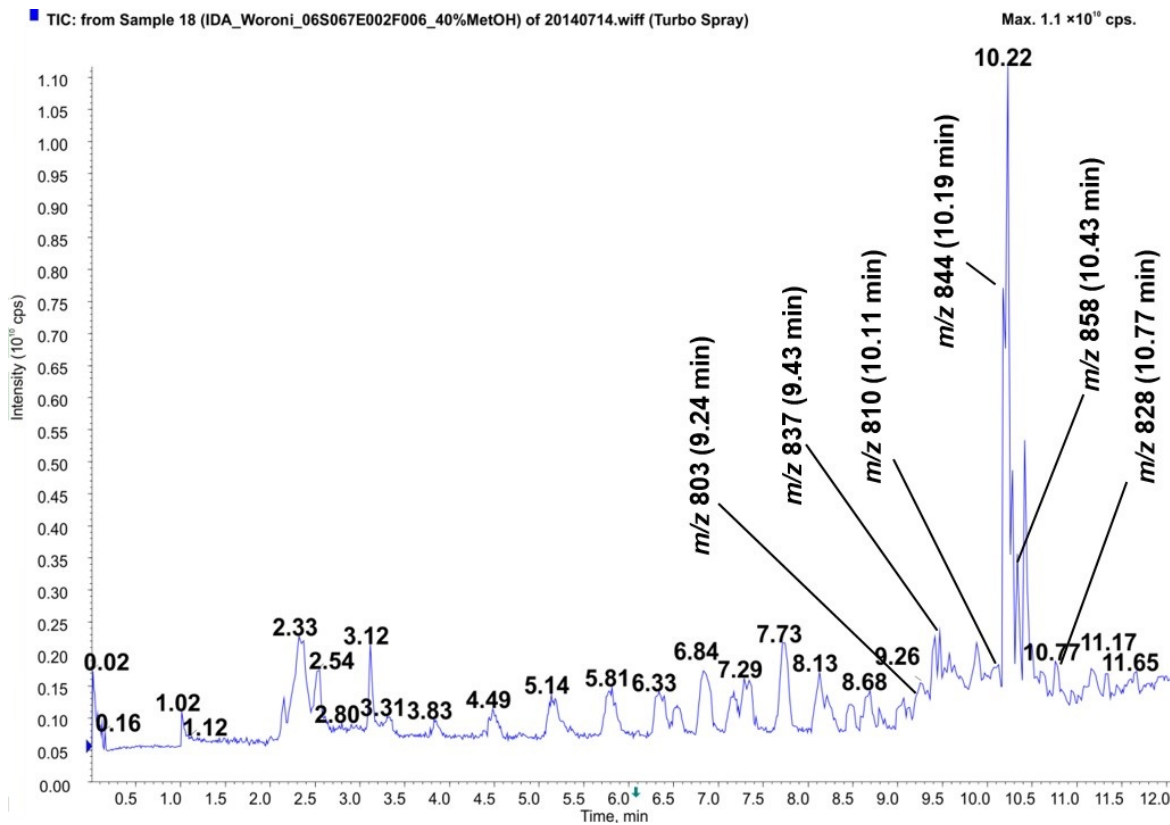

**Figure S13.** LC-MS/MS chromatogram of the 40% methanol fraction indicating the compounds at  $m/z$  803, 810, 828, 837, 844 and 858. The intensity of the ion on the  $y$ -axis is given as counted ions per second (cps) and the time (minutes) on the  $x$ -axis.

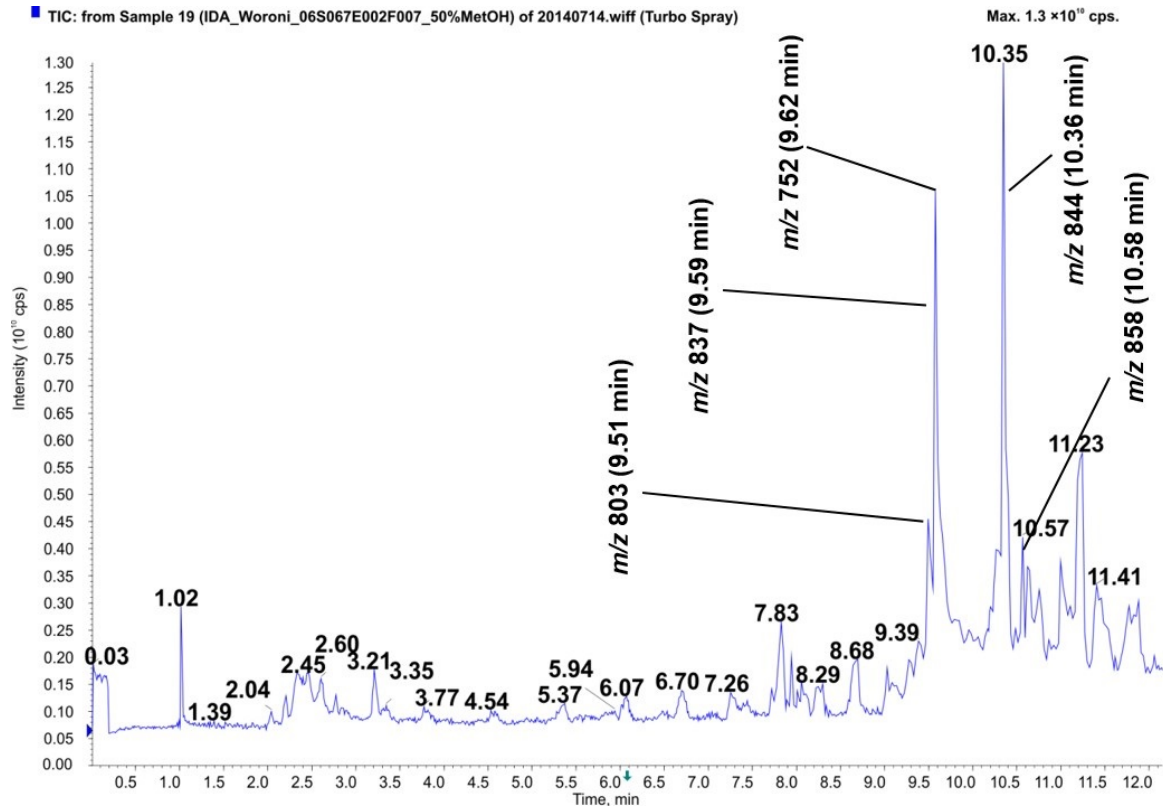

**Figure S14.** LC-MS/MS chromatogram of the 50% methanol fraction indicating the compounds at  $m/z$  752, 803, 837, 844 and 858. The intensity of the ion on the  $y$ -axis is given as counted ions per second (cps) and the time (minutes) on the  $x$ -axis.

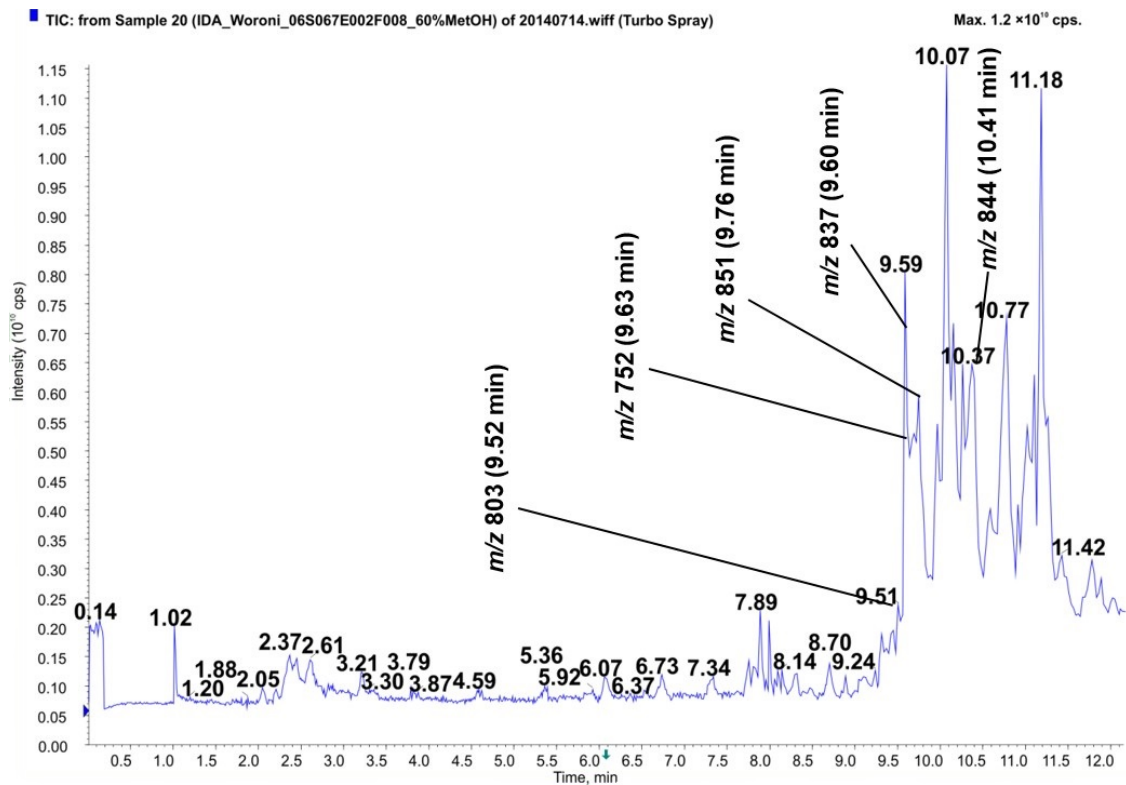

**Figure S15.** LC-MS/MS chromatogram of the 60% methanol fraction indicating the compounds at  $m/z$  752, 803, 837, 844 and 851. The intensity of the ion on the  $y$ -axis is given as counted ions per second (cps) and the time (minutes) on the  $x$ -axis.

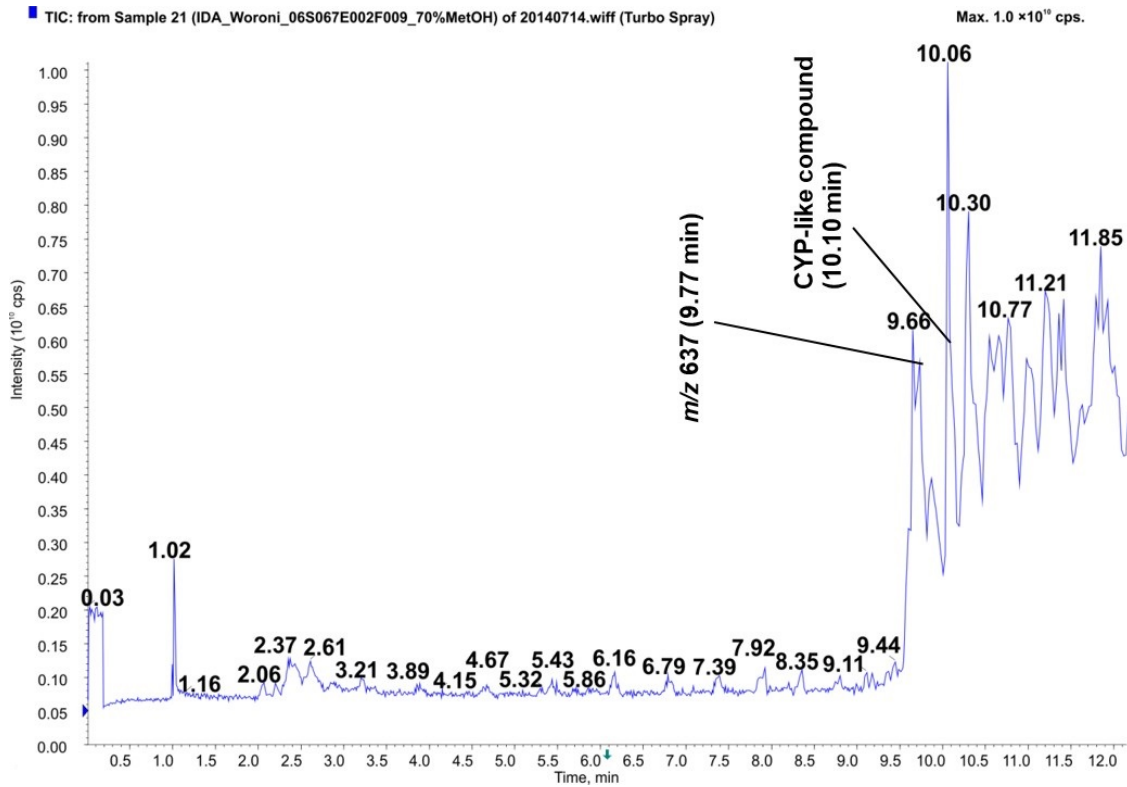

**Figure S16.** LC-MS/MS chromatogram of the 70% methanol fraction indicating the compound at  $m/z$  637 and a cyanopeptolin-like (CYP-like). The intensity of the ion on the  $y$ -axis is given as counted ions per second (cps) and the time (minutes) on the  $x$ -axis.

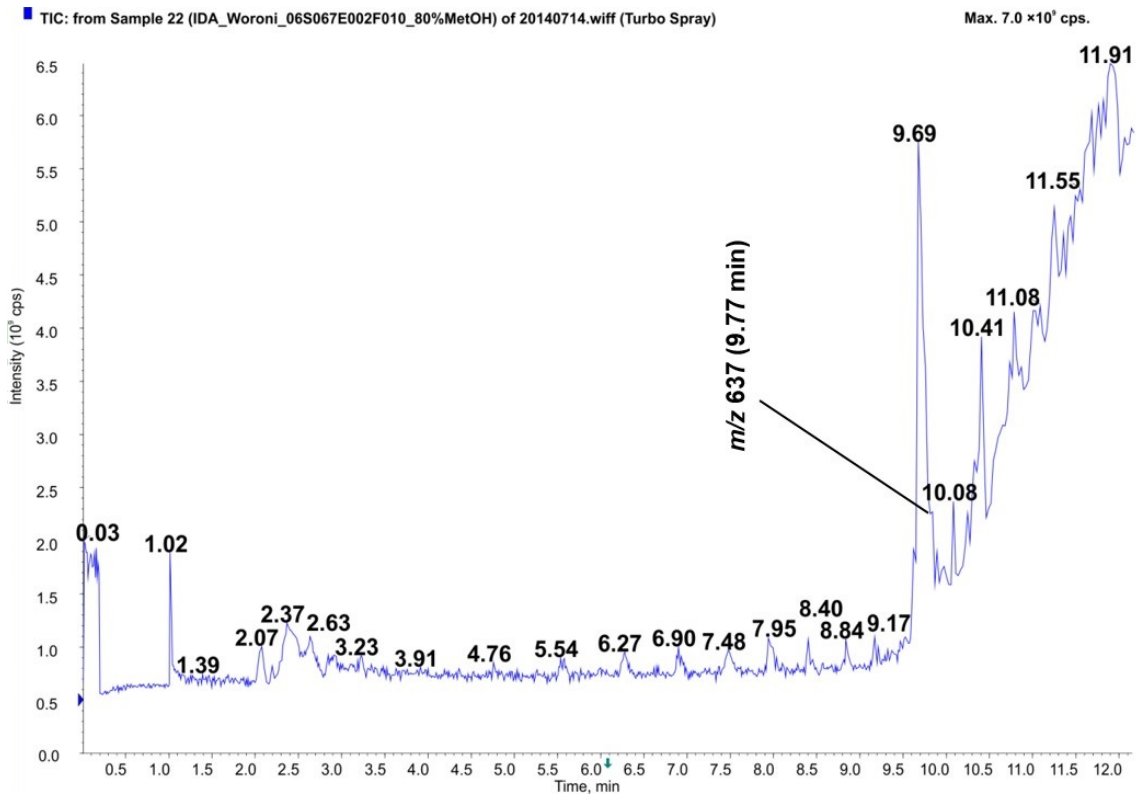

**Figure S17.** LC-MS/MS chromatogram of the 80% methanol fraction indicating the compound at  $m/z$  637. The intensity of the ion on the  $y$ -axis is given as counted ions per second (cps) and the time (minutes) on the  $x$ -axis.

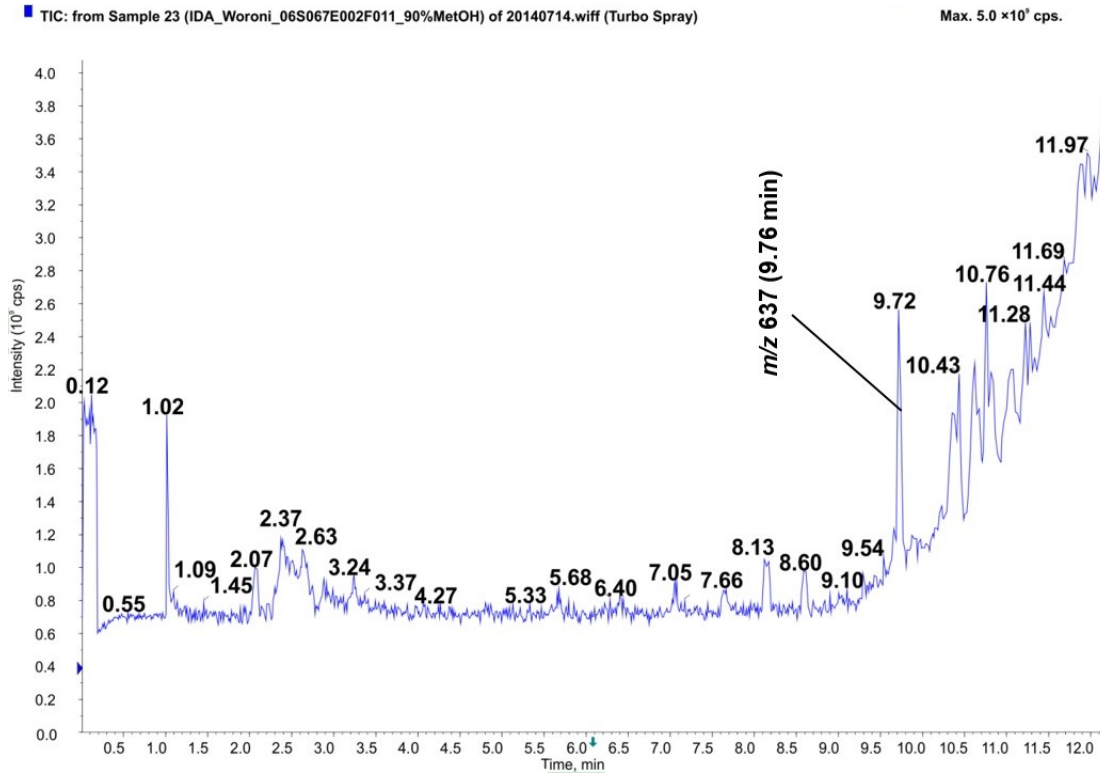

**Figure S18.** LC-MS/MS chromatogram of the 90% methanol fraction indicating the compound at  $m/z$  637. The intensity of the ion on the  $y$ -axis is given as counted ions per second (cps) and the time (minutes) on the  $x$ -axis.

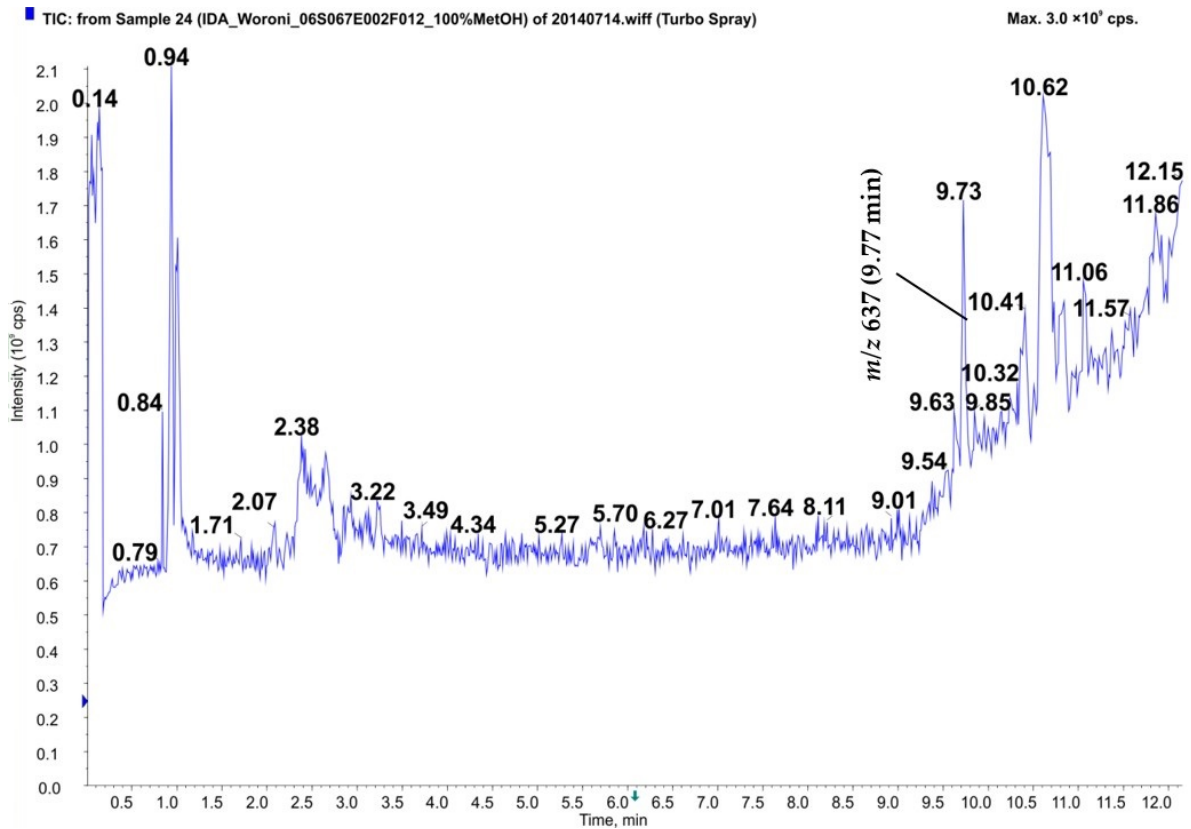

**Figure S19.** LC-MS/MS chromatogram of the 100% methanol fraction indicating the compound at  $m/z$  637. The intensity of the ion on the  $y$ -axis is given as counted ions per second (cps) and the time (minutes) on the  $x$ -axis.
